# Supplementary material
Source: PubMed Central journal article supplement (PMC4907134)
Supplement: IAI.00138-16_zii999091709so1.pdf [file IAI.00138-16_zii999091709so1.pdf]

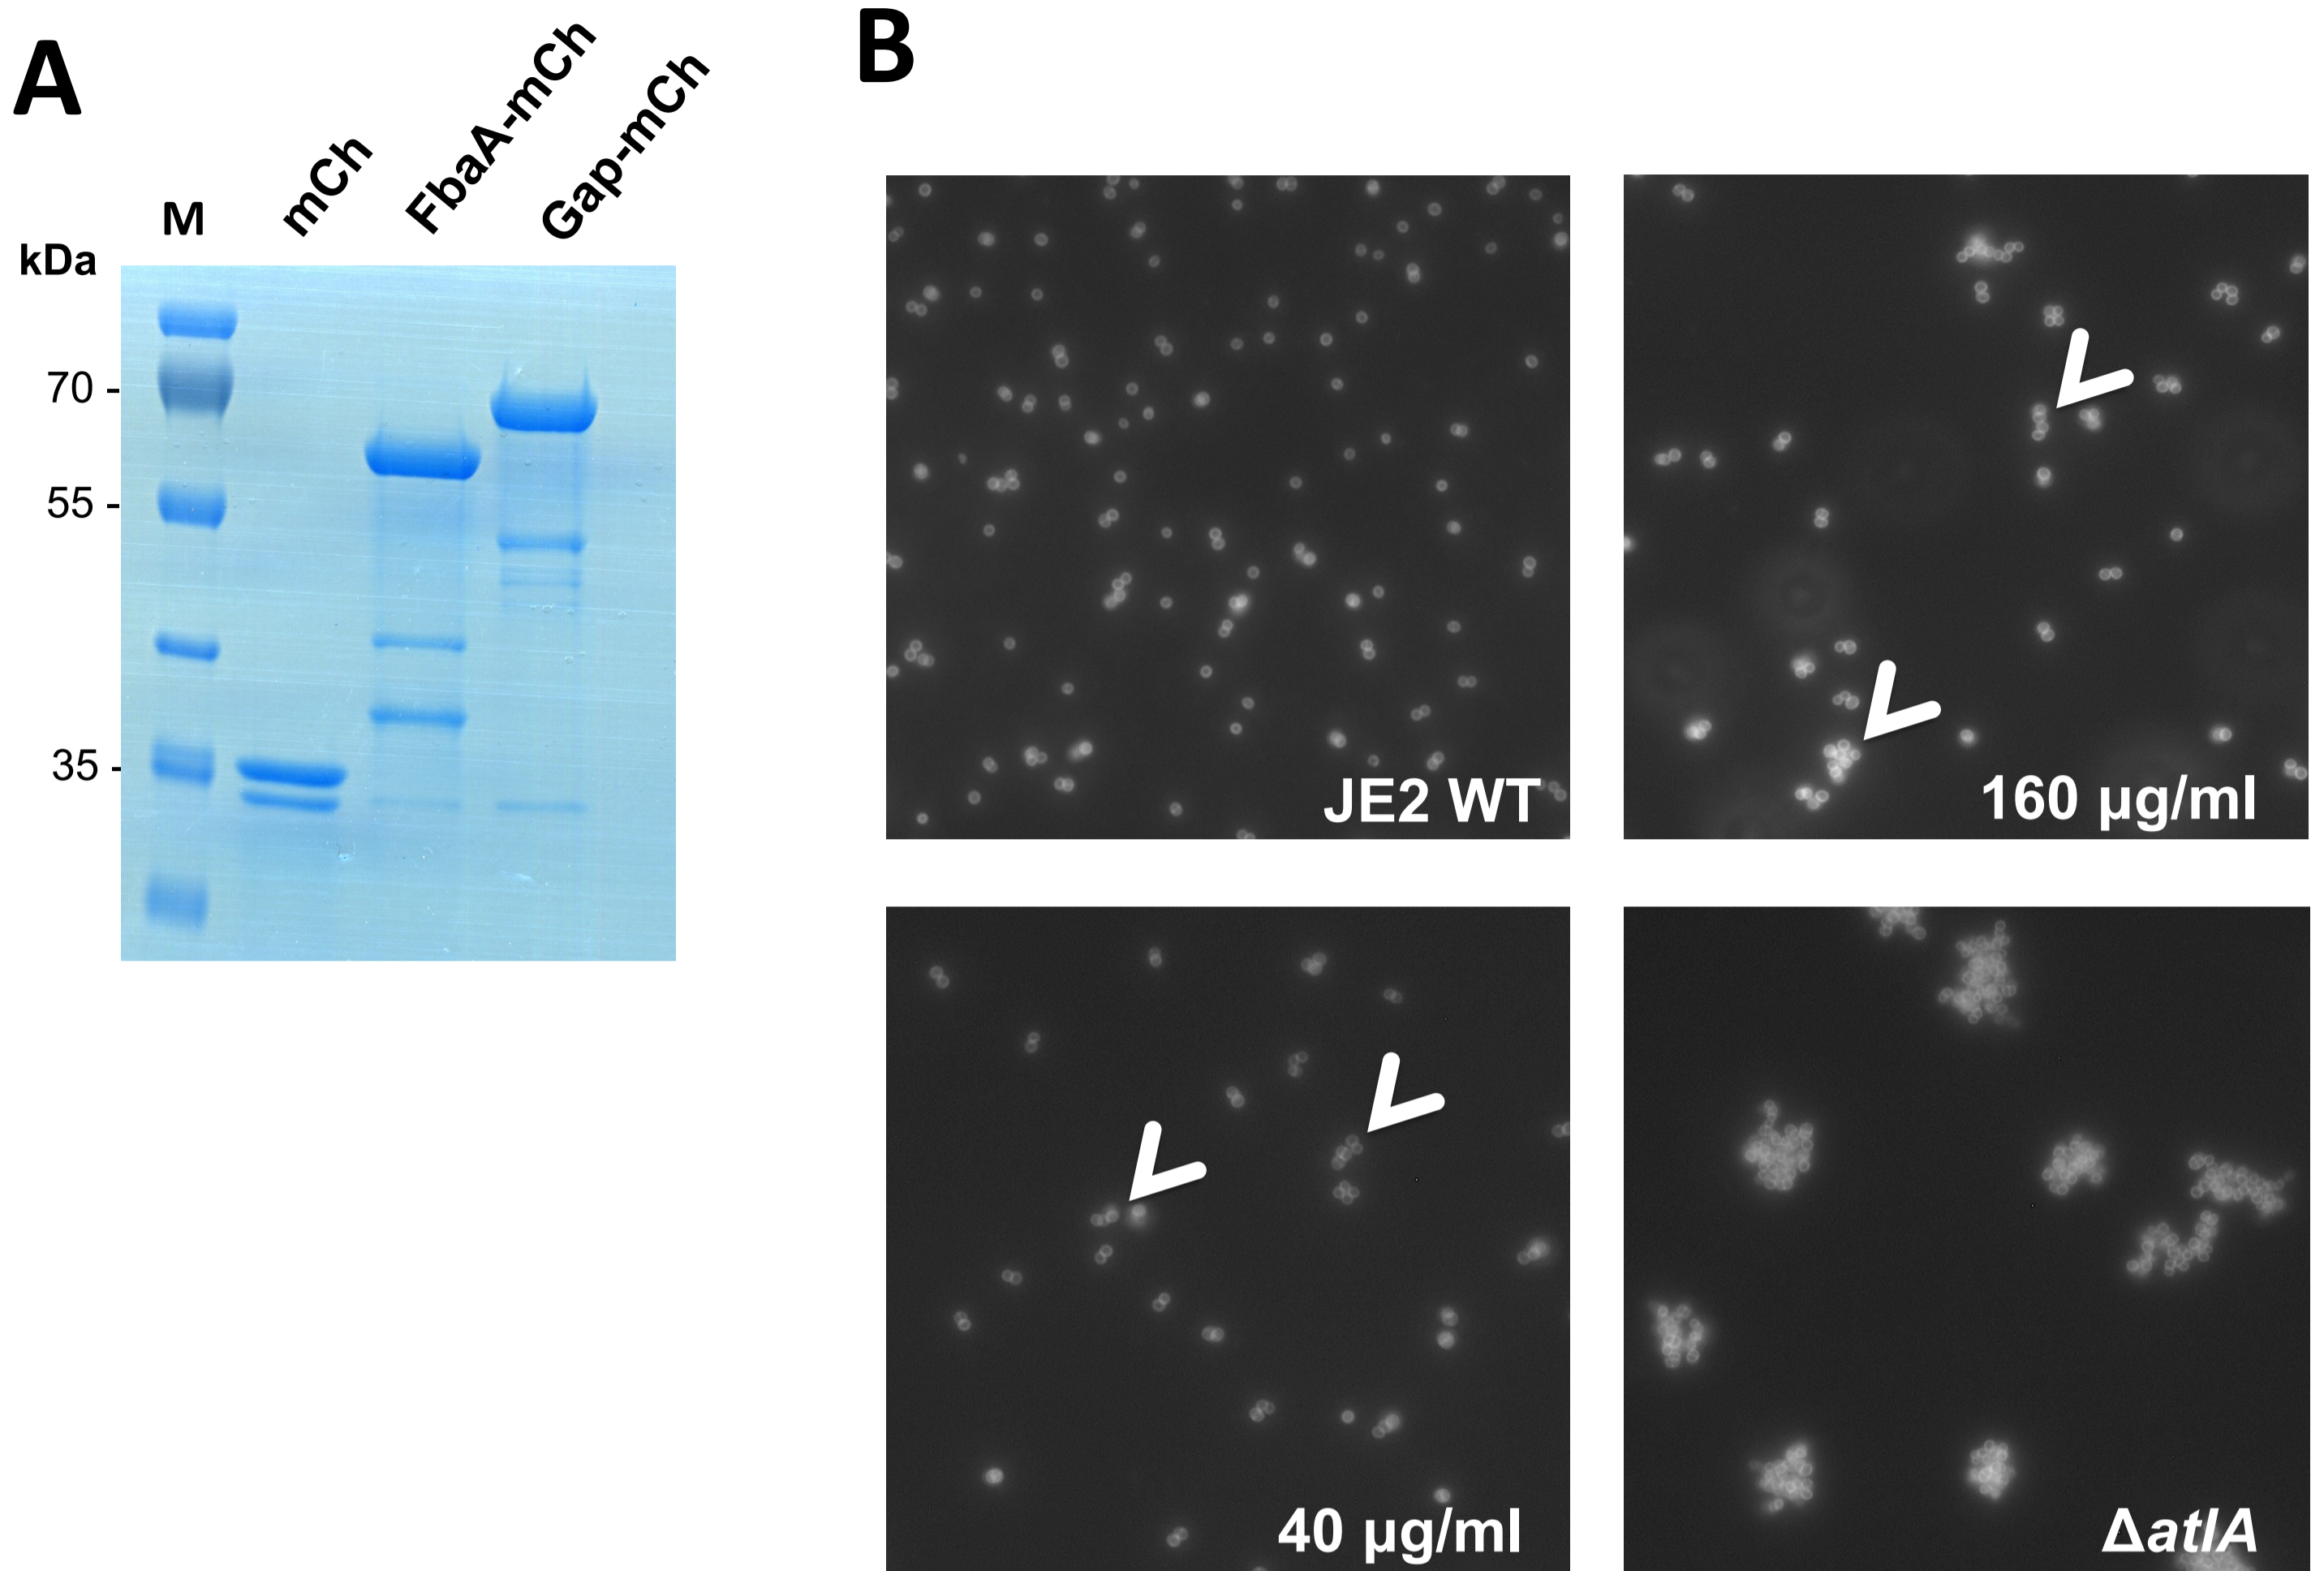

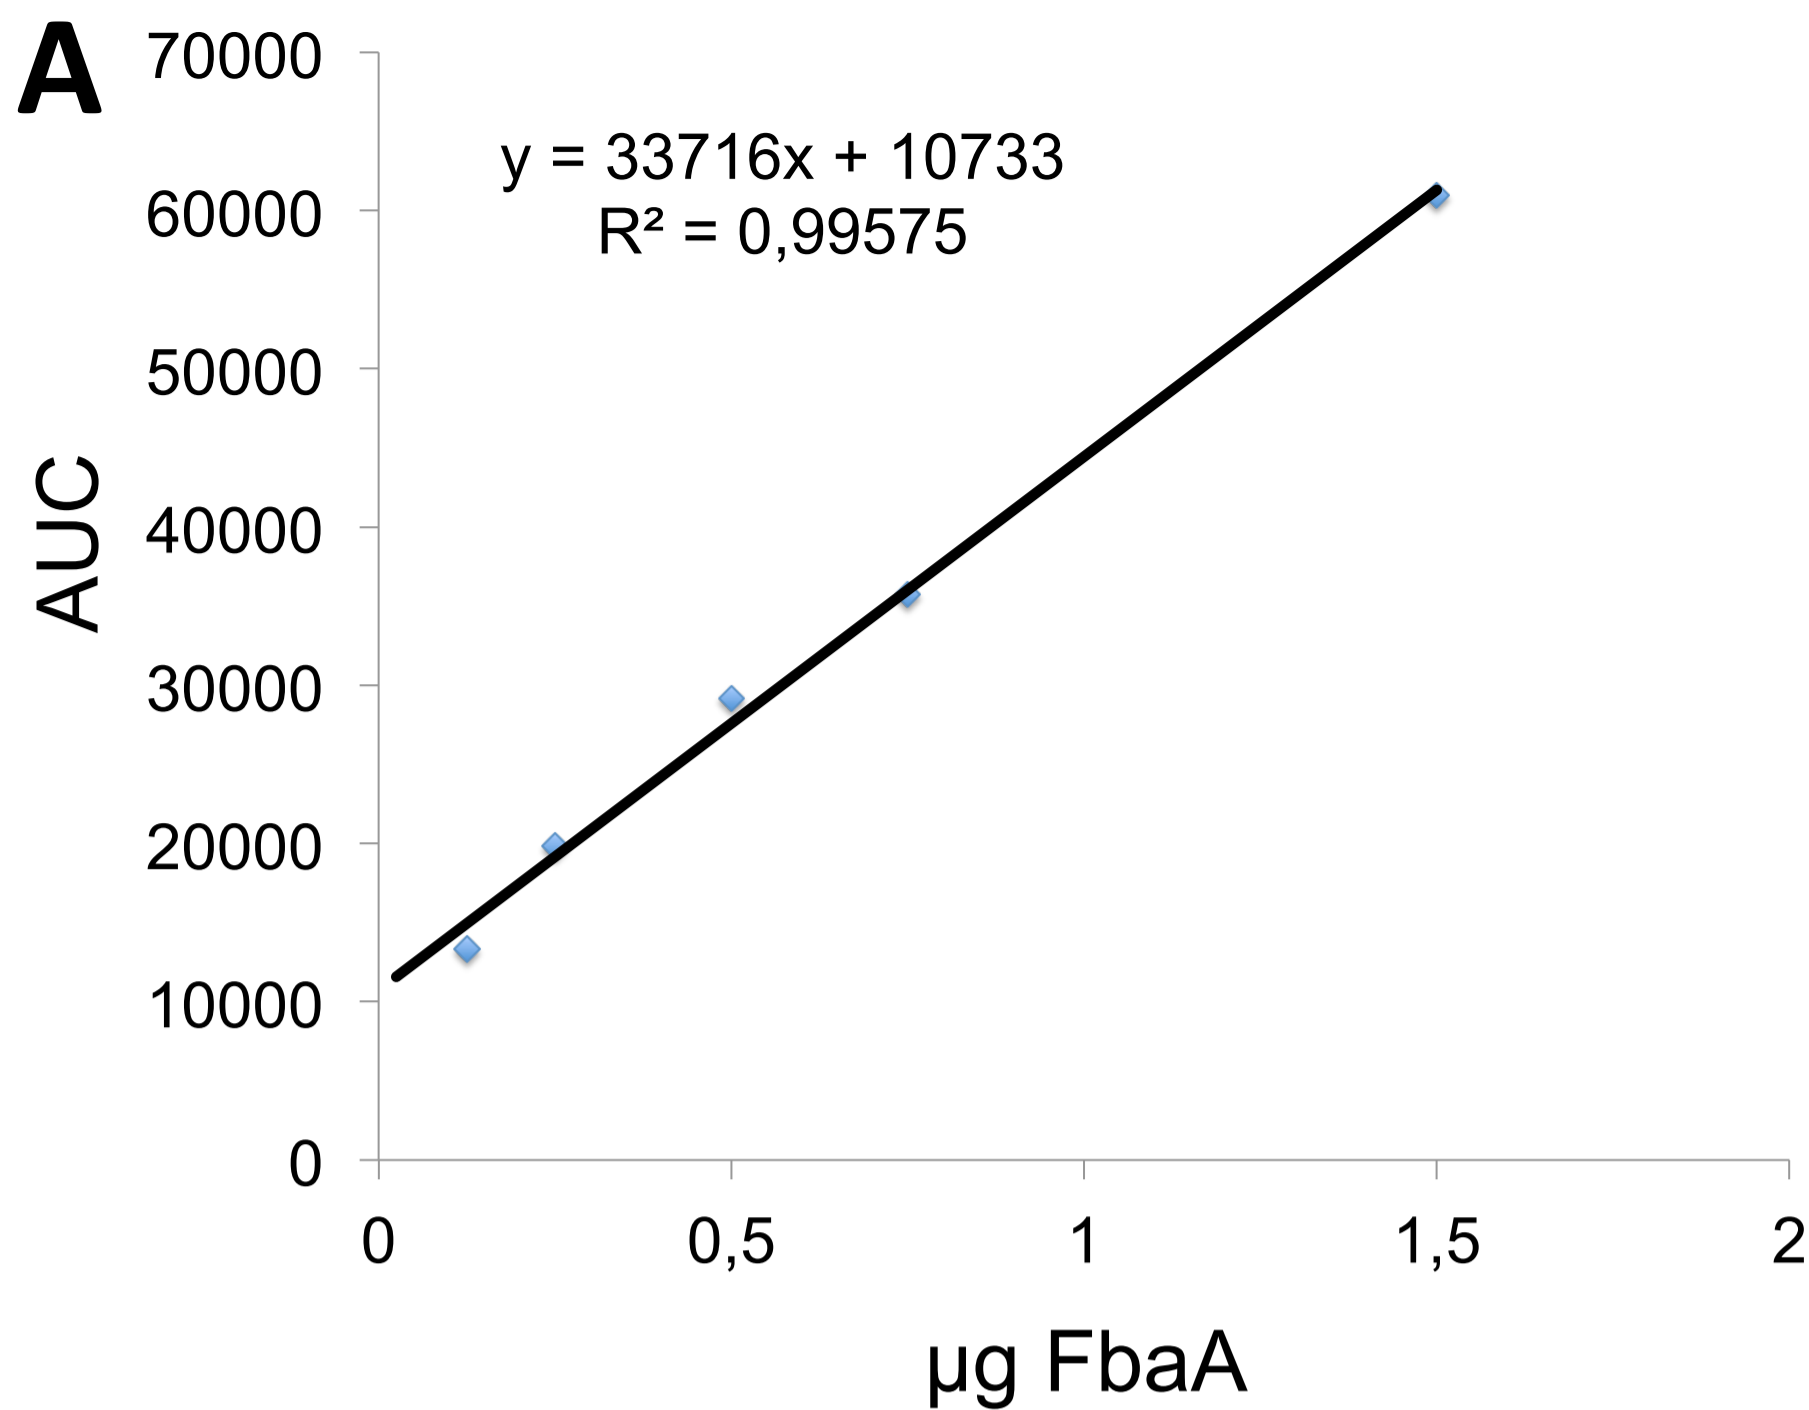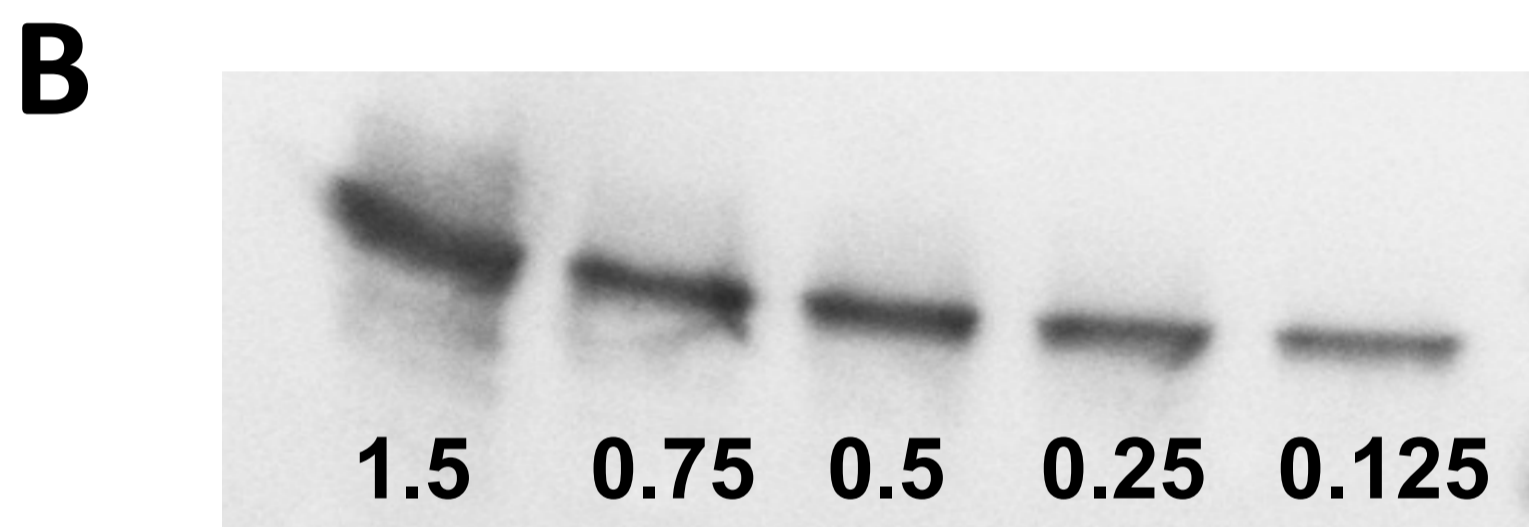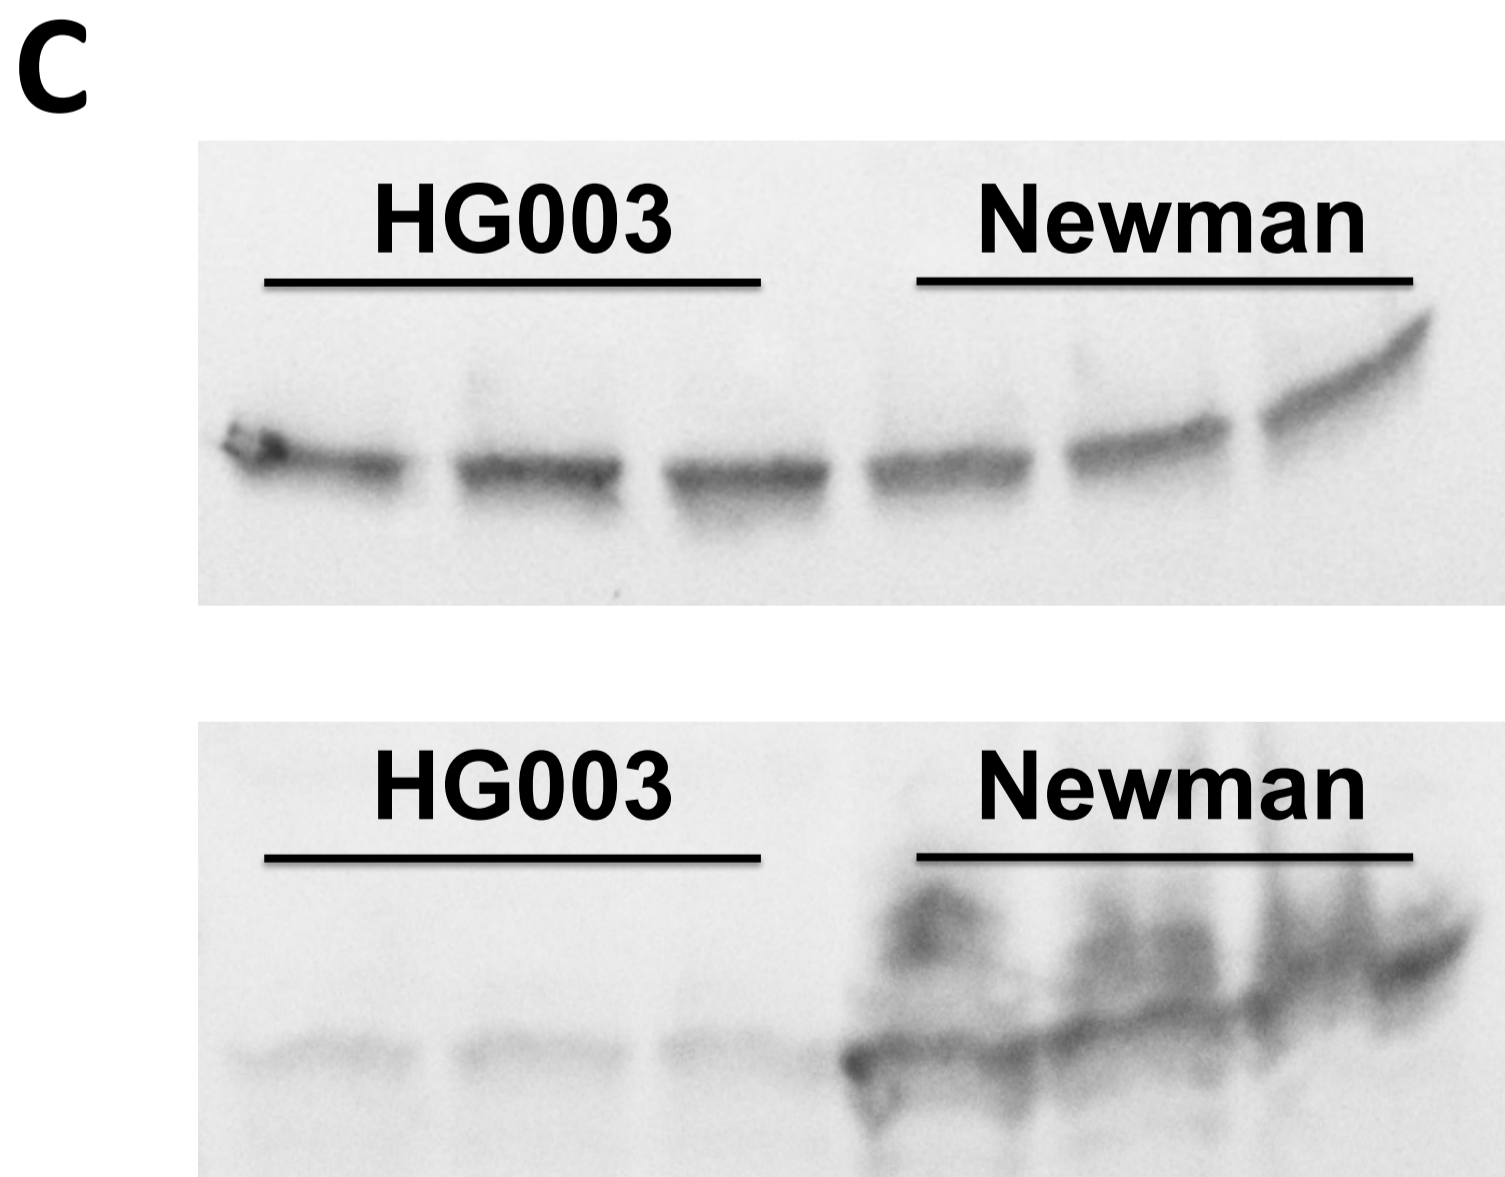

**Fig. S2 Quantification of FbaA by Western blot. (A)** Standard curve of purified FbaA, AUC (area under the curve) **(B)** Western blot of standard samples with different concentrations. **(C)** Western blot from lysostaphin lysed cells. **(D)** Western blot from supernatant samples

Table S1. Strains used in this study

| <b>Bacterial strain</b>                                          | <b>Description</b>                                                   | <b>Reference</b> |
|------------------------------------------------------------------|----------------------------------------------------------------------|------------------|
| <i>S. aureus</i> USA300 JE2                                      | Wild type                                                            | (1)              |
| <i>S. aureus</i> USA300 JE2 $\Delta spa$                         | Markerless deletion of the <i>spa</i> locus                          | This study       |
| <i>S. aureus</i> HG001 $\Delta spa$                              | Markerless deletion of the <i>spa</i> locus                          | (2)              |
| <i>S. aureus</i> HG003 $\Delta spa$                              | Markerless deletion of the <i>spa</i> locus                          | This study       |
| <i>S. aureus</i> Newman $\Delta spa$                             | Markerless deletion of the <i>spa</i> locus                          | This study       |
| <i>S. aureus</i> COL $\Delta spa$                                | Markerless deletion of the <i>spa</i> locus                          | This study       |
| <i>S. aureus</i> SA113 $\Delta spa$                              | Markerless deletion of the <i>spa</i> locus                          | This study       |
| <i>S. aureus</i> SA113 $\Delta atlA$                             | Markerless deletion of the <i>AtlA</i> .                             | (3)              |
| <i>S. aureus</i> SA113 $\Delta spa \Delta srtA$                  | Markerless deletion of the <i>spa</i> locus. Deletion of <i>srtA</i> | (4)              |
| <i>S. aureus</i> SA113 $\Delta spa \Delta atlA$                  | Markerless deletion of the <i>spa</i> locus. Deletion of <i>AtlA</i> | (5)              |
| <i>S. carnosus</i> TM300                                         | Wild type                                                            | (6)              |
| <i>S. epidermidis</i> O-47                                       | Wild type                                                            | (7)              |
| <i>S. aureus</i> SA113 $\Delta spa$ pCtufamp- <i>fbaA-strep</i>  | Constitutive expression of <i>FbaA-strep</i>                         | This study       |
| <i>S. aureus</i> SA113 $\Delta spa$ pCtufamp- <i>gapDH-strep</i> | Constitutive expression of <i>GapDH-strep</i>                        | This study       |
| <i>E. coli</i> DC10B pCtufamp- <i>mCh-strep</i>                  | Constitutive expression of <i>mCh-strep</i>                          | This study       |
| <i>E. coli</i> DC10B pCtufamp- <i>gapDH-mCh-strep</i>            | Constitutive expression of <i>GapDH-mCh-strep</i>                    |                  |
| <i>E. coli</i> DC10B pCtufamp- <i>fbaA-mCh-strep</i>             | Constitutive expression of <i>FbaA-mCh-strep</i>                     | This study       |
| <i>E. coli</i> M15 pEQ- <i>amiE</i>                              |                                                                      | (3)              |
| <i>E. coli</i> M15 pEQ- <i>amiE-R1,2</i>                         |                                                                      | (3)              |
| <i>E. coli</i> M15 pEQ- <i>glucosaminidase</i>                   |                                                                      | (3)              |

1. **Fey PD, Endres JL, Yajjala VK, Widhelm TJ, Boissy RJ, Bose JL, Bayles KW.** 2013. A genetic resource for rapid and comprehensive phenotype screening of nonessential *Staphylococcus aureus* genes. MBio 4:e00537-00512.

2. **Schuster CF, Mechler L, Nolle N, Krismer B, Zelder ME, Gotz F, Bertram R.** 2015. The MazEF Toxin-Antitoxin System Alters the beta-Lactam Susceptibility of *Staphylococcus aureus*. PLoS One **10**:e0126118.
3. **Biswas R, Voggu L, Simon UK, Hentschel P, Thumm G, Götz F.** 2006. Activity of the major staphylococcal autolysin Atl. FEMS Microbiol Lett **259**:260-268.
4. **Yu W, Götz F.** 2012. Cell Wall antibiotics provoke accumulation of anchored mCherry in the cross wall of *Staphylococcus aureus*. PLoS One **7**:e30076.
5. **Pasztor L, Ziebandt AK, Nega M, Schlag M, Haase S, Franz-Wachtel M, Madlung J, Nordheim A, Heinrichs DE, Götz F.** 2010. Staphylococcal major autolysin (atl) is involved in excretion of cytoplasmic proteins. J Biol Chem **285**:36794-36803.
6. **Schleifer KH, F, U.** 1982. Description of a New Species of the Genus Staphylococcus: *Staphylococcus carnosus*. International Journal of Systematic Bacteriology **32**:153-156.
7. **Heilmann C, Hussain M, Peters G, Götz F.** 1997. Evidence for autolysin-mediated primary attachment of *Staphylococcus epidermidis* to a polystyrene surface. Mol Microbiol **24**:1013-1024.

Table S2. Primers used in the study

| <b>Primer name</b>      | <b>Sequence</b>                                                           |
|-------------------------|---------------------------------------------------------------------------|
| up_fwd_Δspa             | CAGATCTGTCGACGATATCGTGATATACAAGGAGATAAAAC                                 |
| up_rev_Δspa             | TTTATAGTTCCTTTTTCAAATTAATACCCCTG                                          |
| down_fwd_Δspa           | TTTGAAAAAGGAACTATAAAAACAAACAATACACAAC                                     |
| down_rev_Δspa           | GGCATGCAAGCTTGATATCATCGCAAAATATAAGTTGAAATAG                               |
| fbaAFwd_fbamCh          | GTTGAGGAGGTTTAATTAATGCCTTTAGTTTCAATGAAAG                                  |
| fbaARev_fbamCh          | TTGCTCACTTTAGCGCGGTTTGAAGTAC                                              |
| mCh_fwd_fbamCh          | GCGCTAAAGTGAGCAAGGGCGAGGAG                                                |
| mCh_rev_ECPfusstr<br>ep | TAAGTACTTCAGCTAATTAAGCTTATTTTTCAAATTGTGGATGTGACC<br>ACTTGTACAGCTCGTCCATGC |
| gapFwd_fbamCh           | GTTGAGGAGGTTTAATTAATGGCAGTAAAAGTAGCAATTAATG                               |
| gapRev_fbamCh           | TTGCTCACTTTAGAAAAGTTCAGCTAAGTATG                                          |
| mCh_fwd_gapmCh          | ACTTTCTAAAGTGAGCAAGGGCGAGGAG                                              |
